# Supplementary material for: Study of the doping effect on imperfect morphology at photovoltaic heterojunctions in bilayer organic solar cells
Source: Royal Society of Chemistry journal article supplement (doi:10.1039/d2tc01920e), 2022-01-01
Supplement: d2tc01920e1.pdf [file d2tc01920e1.pdf]

## Supporting Information

# Study of the Doping Effect on Imperfect Morphology at Photovoltaic Heterojunction in Bilayer Organic Solar Cells

Zhenyu Chen,<sup>a</sup> Hong Zheng\*,<sup>b</sup> Wei Ma,<sup>a</sup> Han Yan\*,<sup>a,c</sup>

### Table of content

|                                                                                                                                           |    |
|-------------------------------------------------------------------------------------------------------------------------------------------|----|
| <b>Experimental section</b>                                                                                                               | 1  |
| <b>Materials</b>                                                                                                                          | 1  |
| <b>Instrumentation</b>                                                                                                                    | 1  |
| <b>Device fabrication</b>                                                                                                                 | 2  |
| <b>Calculating energy loss</b>                                                                                                            | 3  |
| <b>Calculating polar angle</b>                                                                                                            | 3  |
| <b>Calculating numbers of lamellar or pi-pi stacking</b>                                                                                  | 4  |
| <b>Computational details</b>                                                                                                              | 4  |
| <b>Fig. S1</b> AFM images of PBDB-T films via different solvent deposition                                                                | 6  |
| <b>Fig. S2</b> In plane and out of plane line cuts of PBDB-T (CB), PBDB-T (TL) and ITIC films                                             | 6  |
| <b>Fig. S3</b> Pole figure of (010) diffraction peaks and statistics of orientation population ratio from pole figure                     | 7  |
| <b>Fig. S4</b> The solution absorption spectra of PBDB-T.                                                                                 | 7  |
| <b>Fig. S5</b> The cartoons of the PHJ device fabrication process.                                                                        | 7  |
| <b>Fig. S6</b> Two-dimensional GIWAXS pattern of ITIC film                                                                                | 8  |
| <b>Fig. S7</b> Temperature-dependent photoluminescence (PL) spectra for PBDB-T(CB)/ITIC films                                             | 8  |
| <b>Fig. S8</b> Evolution of PL intensity as a function of temperature from 78 to 298 K for the ITIC film in PBDB-T(TL)/ITIC based devices | 9  |
| <b>Fig. S9</b> Temperature-dependent photoluminescence (PL) spectra for PBDB-T(TL)/ITIC films                                             | 9  |
| <b>Fig.S10</b> Light intensity dependent Voc plots                                                                                        | 10 |
| <b>Fig. S11</b> The determination of device band-gap energy ( $E_g^{PV}$ ) from EQE spectra                                               | 10 |
| <b>Fig. S12</b> Reduced sEQE and EL spectrum of a PBDB-T(CB)/ITIC doped PHJ device                                                        | 11 |
| <b>Fig. S13</b> Complex conformation of another e-f structure film (e-f B model)                                                          | 11 |
| <b>Fig. S14</b> The related frontier molecular orbitals of complex structure molecules are obtained by DFT calculations                   | 12 |

**Experimental section**

**Materials:** PBDB-T and ITIC were purchased from Solarmer Materials Inc. F6TCNNQ was purchased from Sigma-Aldrich. All chemicals were used as received without further purification.

**Instrumentation:** The GIWAXS measurements of the control and doped films were performed at beamline 7.3.3 at the Advanced Light Source.<sup>1</sup> Samples were prepared on Si substrates using identical blend solutions as those used in devices. The 10 keV X-ray beam was incident at a grazing angle of 0.11°-0.15°. The scattered x-ray was detected using a Dectris Pilatus 2M photon counting detector.

The  $J$ - $V$  curves were performed in the N<sub>2</sub>-filled glovebox under AM 1.5G (100 mW cm<sup>-2</sup>) using an AAA solar simulator (SS-F5-3A, Enli Technology Co., Ltd.) calibrated with a standard photovoltaic cell equipped with KG5 filter. The  $EQE$  curves were measured by Solar Cell Spectral Response Measurement System QE-R3018 (Enli Technology Co., Ltd.) with calibrated light intensity by a standard Si photovoltaic cell. The absorbance spectra were obtained on a Shimadzu UV-3600 Plus Spectrophotometer.

EL measurement uses the direct-current meter (PWS2326, Tectronix) to provide bias voltage to the device, then the luminous signals are collected by fluorescence spectrometer (KYMERA-328I-B2, Andor technology LTD). The  $EQE_{EL}$  measurement system is consisted of a Keithley 2400 digital source meter, Keithley 6482 picoammeters and a standard Si detector (S1337-1010Br). For the sensitive  $EQE$  ( $sEQE$ ) measurement, the light from halogen light source (LSH-75, Newport) becomes monochromatic light by using a monochromator (CS260-RG-3-MC-A, Newport), and is focused on the device to generate electrical signals. Then the signals are

amplified by the front-end current amplifier (SR570, Stanford) and finally collected by the phase-locked amplifier (Newport). The *EQE* spectrum was obtained by using the corrected Si standard detector (S1337-1010Br).

PL spectrum was recorded by FLS980 spectrometer (Edinburgh Instruments, EI) with different excitation wavelength. Temperature-dependent measurement was kept from the temperature range of 78-298 K.

**Device Fabrication:** The PHJ devices were fabricated with a configuration of ITO/ZnO/ITIC/PBDB-T/MoO<sub>x</sub>/Al. The ITO substrates were cleaned by sequential sonication and UVO treatment. The electron-transporting layer of ZnO was deposited by spin-coating a ZnO precursor solution (dissolving zinc acetate in 2-methoxyethanol with ethanolamine) at 4500 rpm for 30s, followed by thermal annealing at 200 °C for 30 min. ITIC (10mg/mL) was spin-coated on the ZnO layer with thickness of ~20 nm. F6TCNNQ was dissolved by ethanol with optimized concentration and process with the spin speed at 6000 rpm for 25s. The PEDOT:PSS was spin-coated on the cleaned glass substrate as a sacrificed layer at 1500 rpm for 30s, followed by thermal annealing at 150 °C for 2 min. As a transfer-film, PBDB-T (10 mg/mL PBDB-T(CB) and 8 mg/ml for PBDB-T(TL)) was spin-coated on the PEDOT:PSS, keeping the PBDB-T film thickness at ~30 nm. For the doped sample, the F6TCNNQ ethanol solution was coated on PBDB-T layer. The transfer-layer (with a structure of glass/PEDOT:PSS/PBDB-T) was immersed in deionized water. After the dissolution of PEDOT:PSS, the PBDB-T layer floated on water. Then we used the ITIC coated ZnO/ITO substrate to stick on top of the PBDB-T layer, simultaneously forming the bilayer heterojunction. Finally, 10 nm MoO<sub>3</sub>/100 nm Al were deposited as the electrode at a vacuum level of  $< 1 \times 10^{-5}$  Pa.

**Calculating the energy loss:** The total energy loss is composed of three parts as is shown by

$$\begin{aligned}
 q\Delta V_{loss} &= E_g^{PV} - qV_{OC} \\
 &= (E_g^{PV} - E_{CT}) + (E_{CT} - qV_{OC, rad}) + (qV_{OC, rad} - qV_{OC}) \\
 &= (E_g^{PV} - E_{CT}) + q\Delta V_r + q\Delta V_{nr}
 \end{aligned} \tag{S1}$$

where  $\Delta V_{loss}$  is the total voltage loss,  $E_g^{PV}$  is the photovoltaic bandgap energy,  $E_{CT}$  is the CT state energy,  $V_{OC, rad}$  is the voltage with only radiative recombination at open circuit condition,  $\Delta V_r$  is the radiative recombination voltage loss owing to absorption edge broadening effects,  $\Delta V_{nr}$  is the nonradiative recombination voltage loss due to the EL radiative efficiency.  $q\Delta V_{nr}$  is calculated by

$$q\Delta V_{loss} = -k_B T E Q E_{EL} \tag{S2}$$

The  $E_g^{PV}$  is determined by [12]

$$E_g^{PV} = \frac{\int_a^b EP(E)dE}{\int_a^b P(E)dE} \tag{S3}$$

where  $P(E) = dEQE_{PV}/dE$ ,  $EQE_{PV}$  is determined by the  $sEQE$  measurement,  $E$  is the photon energy,  $a$  and  $b$  are selected where  $P(a) = P(b) = 0.5\max[P(E)]$ . The CT state is extracted by simultaneously fitting the black-body spectrum ( $\phi_{bb}$ ) calibrated absorption spectrum (Equation (S4)) and the measured emission spectrum (Equation (S5)):

$$\sigma(E)dE = \frac{f}{\sqrt{4\pi\lambda k_B T}} \exp\left(\frac{-(E_{CT} + \lambda - E)^2}{4\lambda k_B T}\right) \tag{S4}$$

$$\frac{I(E)}{E} = \frac{f}{\sqrt{4\pi\lambda k_B T}} \exp\left(\frac{-(E_{CT} - \lambda - E)^2}{4\lambda k_B T}\right)$$

(S5)

where  $f$  is the absorption oscillator strength and  $\lambda$  is the reorganization energy.

**Calculating the polar angle:** A pole figure is a representation of the orientation distribution of crystallographic planes in a sample, which illustrates the texture of a material.  $\omega$  is defined as the angle between the scattering vector and the substrate normal. The scattering intensity near  $\omega = 0^\circ$  and  $90^\circ$  is associated with face-on (Axy) and edge-on (Az) orientations relative to the substrate, respectively. The value of Axy/Az is a measurement of face-on contribution, defined as the ratio between the integrated area (Axy) where  $0^\circ < \omega < 45^\circ$  and the area (Az) where  $45^\circ < \omega < 90^\circ$  according to the reference.<sup>2</sup>

**Calculating the number of lamellar or pi-pi stacking layers:** The calculation method First, we obtained the location of lamellar or  $\pi$ - $\pi$  peak from the GIWAXS patterns, and the coherence length (CL) was calculated from its full width at half maximum (FWHM) as below

$$CL = \frac{2\pi \times 0.9}{FWHM}$$

The distance between two neighboring layers along the lamellar or  $\pi$ - $\pi$  direction was calculated by the corresponding scattering vector of the two peaks

$$d = \frac{2\pi}{q}$$

Therefore, we calculate the number of lamellar or pi-pi stacking layers by

$$n = \frac{CL}{d}$$

This method has been reported by Ye et al. before.<sup>3</sup>

**Computational details:** The poly PBDB-T material was simulated with a fragment structure including three monomer units ended with H was constructed, in which totally 470 atoms are included. In the film structure composed of a PBDB-T fragment and a p-dopant (F6TCNNQ) molecule, different orientations of F6TCNNQ induces two types of conformations, the face-to-face (f-f) and edge-to-face (e-f) structures. In the f-f structure, the F6TCNNQ molecule faces to the lamellar of PBDB-T. The e-f structure can be further defined as two kinds of conformers, in which the F6TCNNQ molecule faces to two sides of the lamellar of PBDB-T. In all these structures, the p-dopant is located around the center unit of the PBDB-T fragment. The interaction between PBDB-T and F6TCNNQ is dominated by van der Waals force. Therefore, the DFT method with the B97XD functional was utilized in the geometrical optimizations because it contains semi-empirical dispersion corrections.<sup>4</sup> In geometrical optimizations, the LanL2DZ basis set with the Los Alamos effective core potentials (ECPs) was used for the S atoms,<sup>5</sup> while other atoms were calculated with the usual splitting valence basis set 6-31G(d).<sup>6-9</sup> Further analyses of frontier molecular orbital, electrostatic potential, and quadrupole component were based upon single point calculations for the individual PBDB-T/F6TCNNQ structures and f-f/e-f conformers. In the single point calculations, a larger basis set 6-311G(d,p)<sup>9</sup> was used for the F6TCNNQ molecular. For the first-row elements in the PBDB-T fragment, to reduce the computational cost, only the center monomer unit was calculated with the 6-311G(d,p) basis set, whereas other parts were calculated with the 6-31G(d) basis set. The S atom was still calculated with the LanL2DZ basis set. All the DFT calculations were conducted with the Gaussian16 package.<sup>10</sup> In addition, the analyses of electrostatic potential were carried out with the Multiwfn\_3.7 program.<sup>11</sup>



## Figures

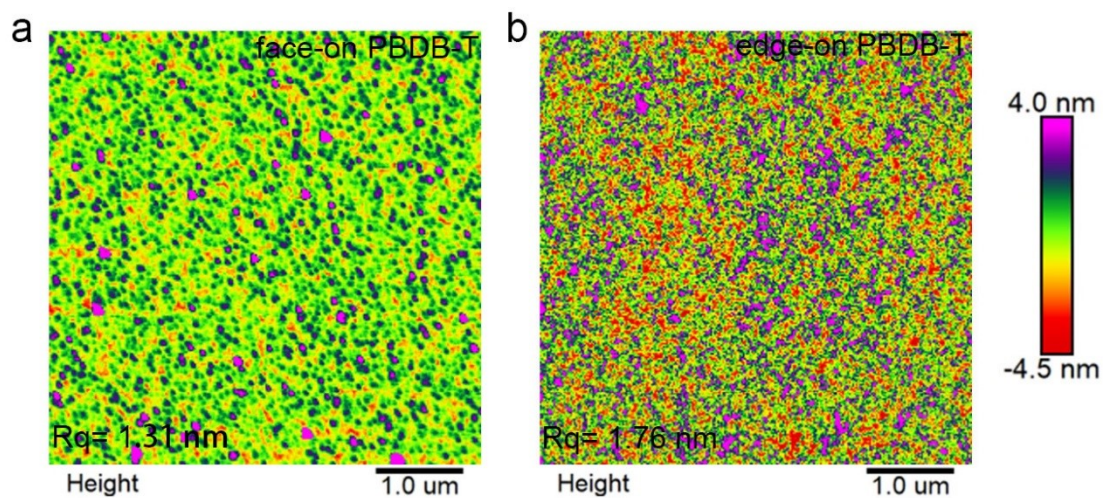

**Fig. S1** AFM images of PBDB-T films via different solvent deposition: (a) f-PBDB-T with CB process and (b) e-PBDB-T with TL process.

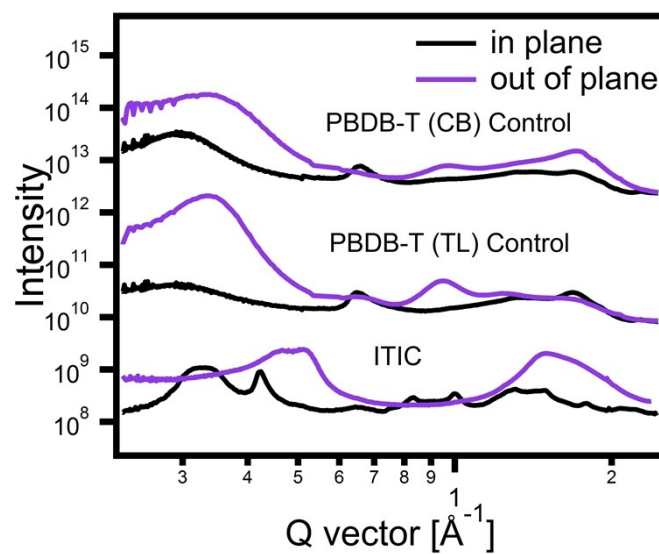

**Fig. S2** In plane and out of plane line cuts of PBDB-T (CB), PBDB-T (TL) and ITIC films.



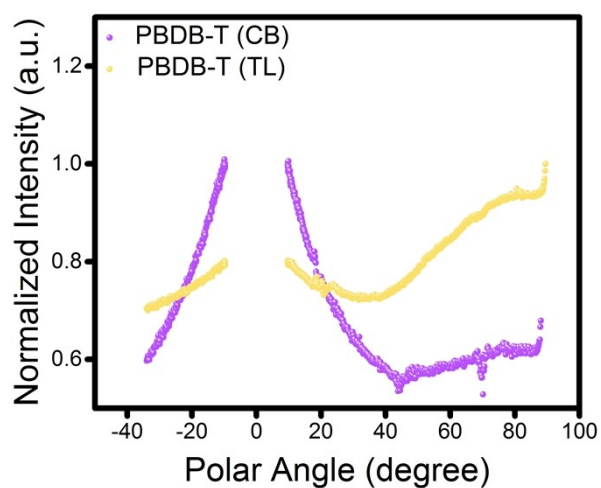

**Fig. S3** Pole figures of (010) diffraction peaks for PBDB-T (CB) and PBDB-T (TL) films in out of plane direction.

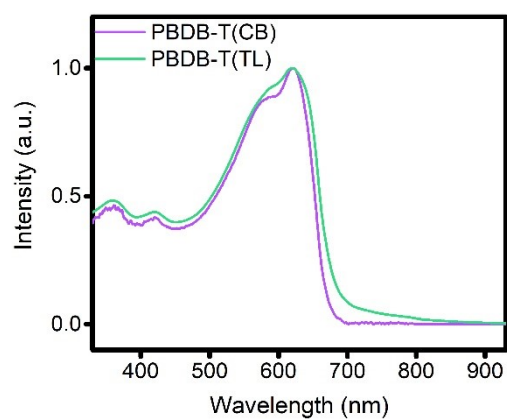

**Fig. 4** The solution absorption spectra of PBDB-T in CB and TL.

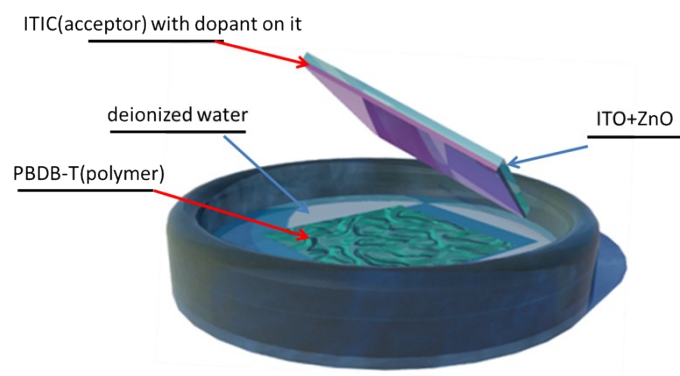

**Fig. S5** Cartoon of the PHJ device fabrication process.

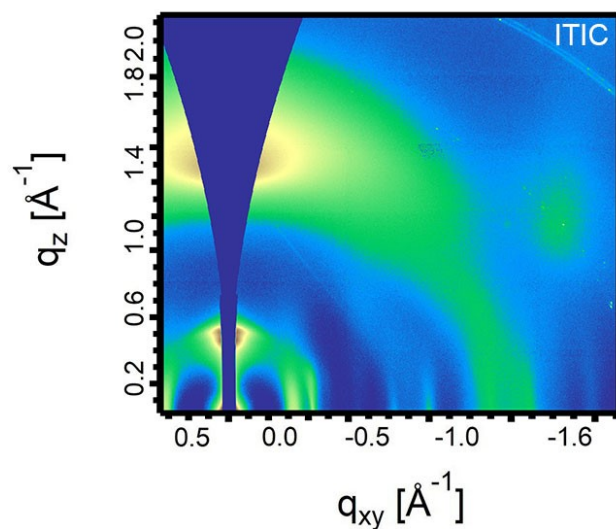

**Fig. S6** Two-dimensional GIWAXS pattern of ITIC film.

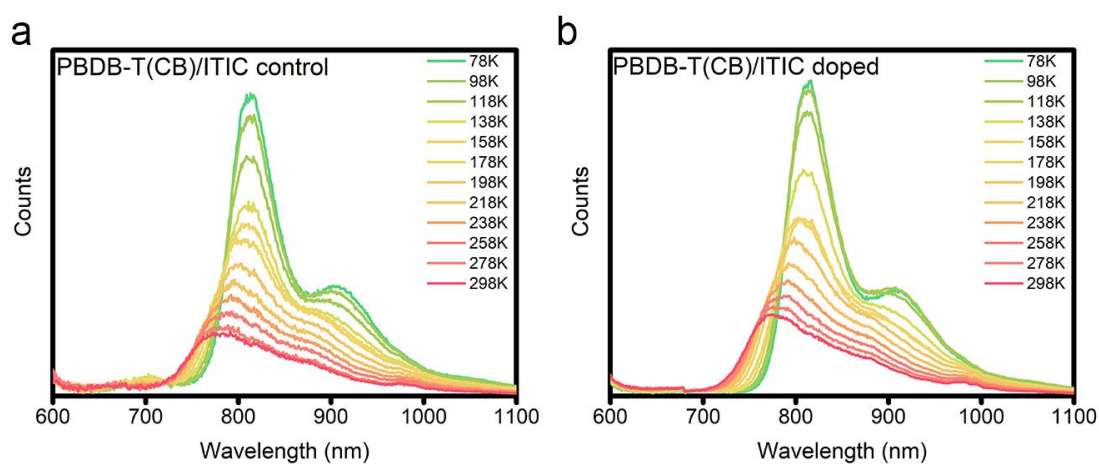

**Fig. S7** Temperature-dependent photoluminescence (PL) spectra for (a) PBDB-T(CB)/ITIC PHJ control films and (b) PBDB-T(CB)/ITIC PHJ doped films. The films excited at 580 nm, and measured with the range from 600 to 1100 nm. The temperature is selected from 78 K to 298 K.

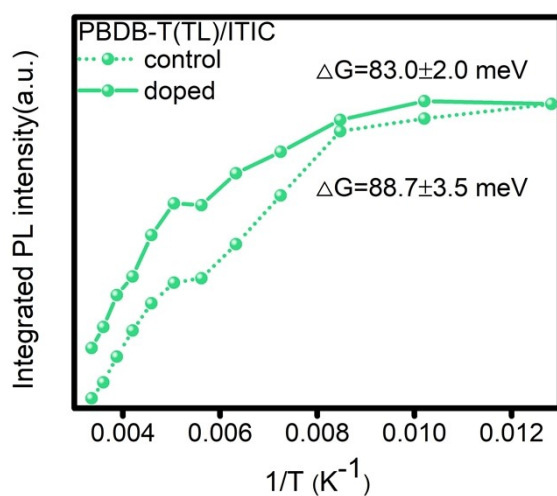

**Fig. S8** Evolution of PL intensity as a function of temperature from 78 to 298 K for the ITIC film in PBDB-T(TL)/ITIC based devices.

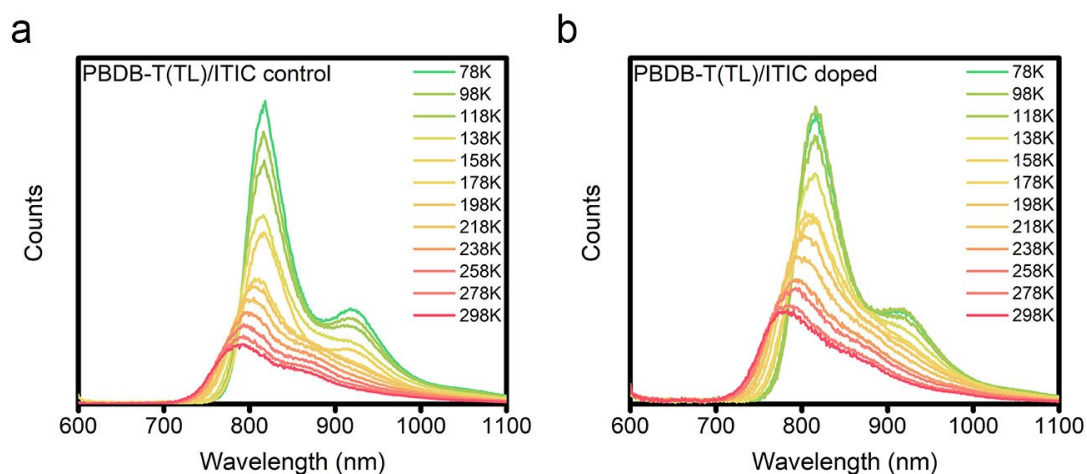

**Fig. S9** Temperature-dependent photoluminescence (PL) spectra for Figure S6. (a) PBDB-T(TL)/ITIC PHJ control films and (b) PBDB-T(TL)/ITIC PHJ doped films. The films excited at 580 nm, and measured with the range from 600 to 1100 nm. The temperature is selected from 78 K to 298 K.

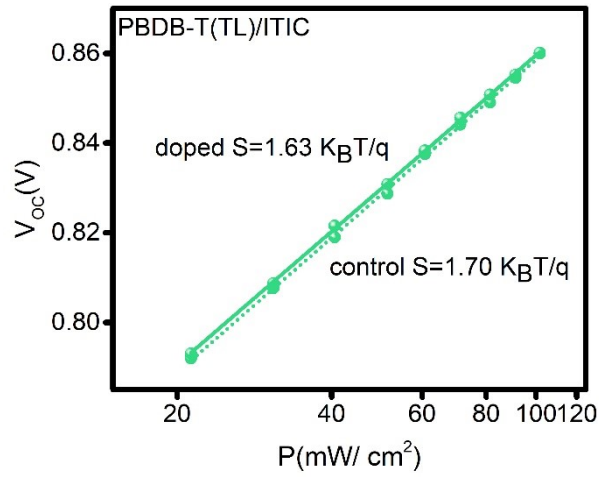

**Fig. S10** Open circuit voltage ( $V_{OC}$ ) of PBDB-T(TL)/ITIC with and without F6TCNNQ doped as a function of light intensity ( $P_{light}$ ).

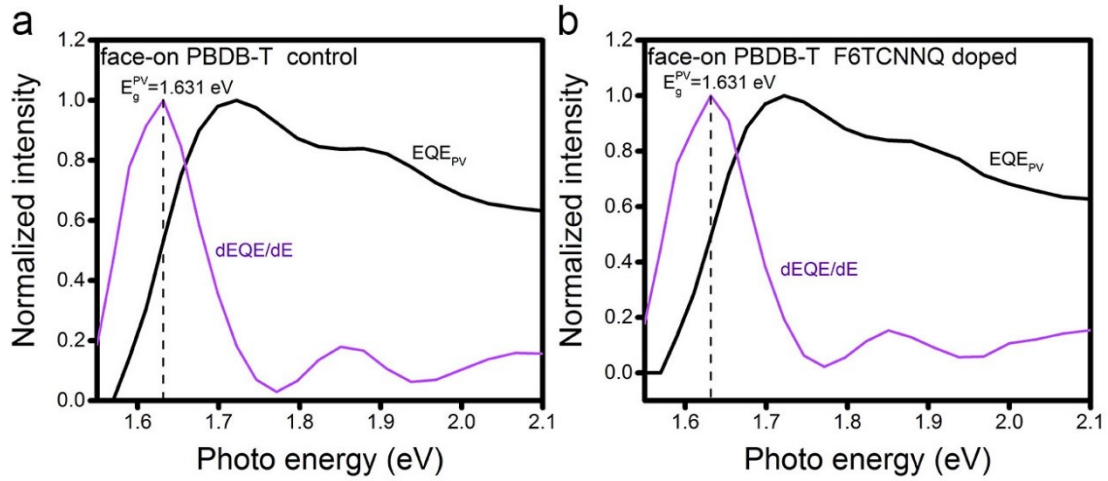

**Fig. S11** The determination of device band-gap energy ( $E_g^{PV}$ ) from EQE spectra: (a) f-f control device and (b) f-f doped device.

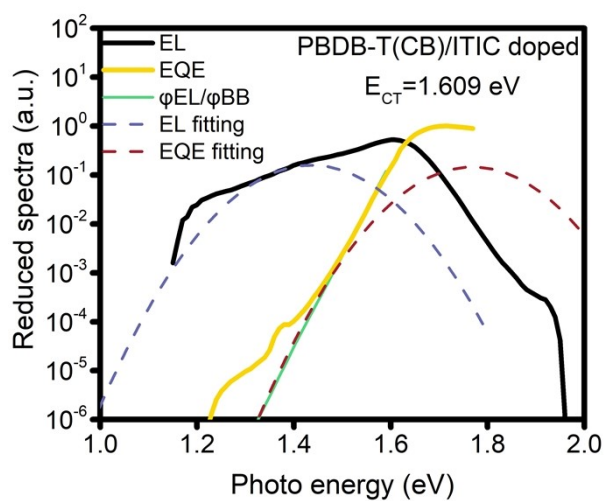

**Fig. 12** Reduced sEQE and EL spectrum of a PBDB-T(CB)/ITIC doped PHJ device. The dash lines are fits of sEQE and EL for obtaining the  $E_{CT}$ .

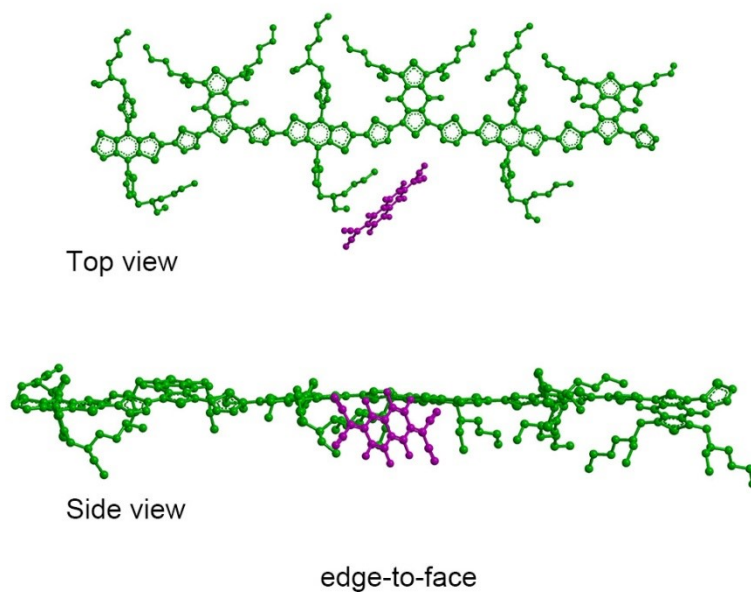

**Fig. S13** Complex conformation of another e-f structure film (e-f B model).

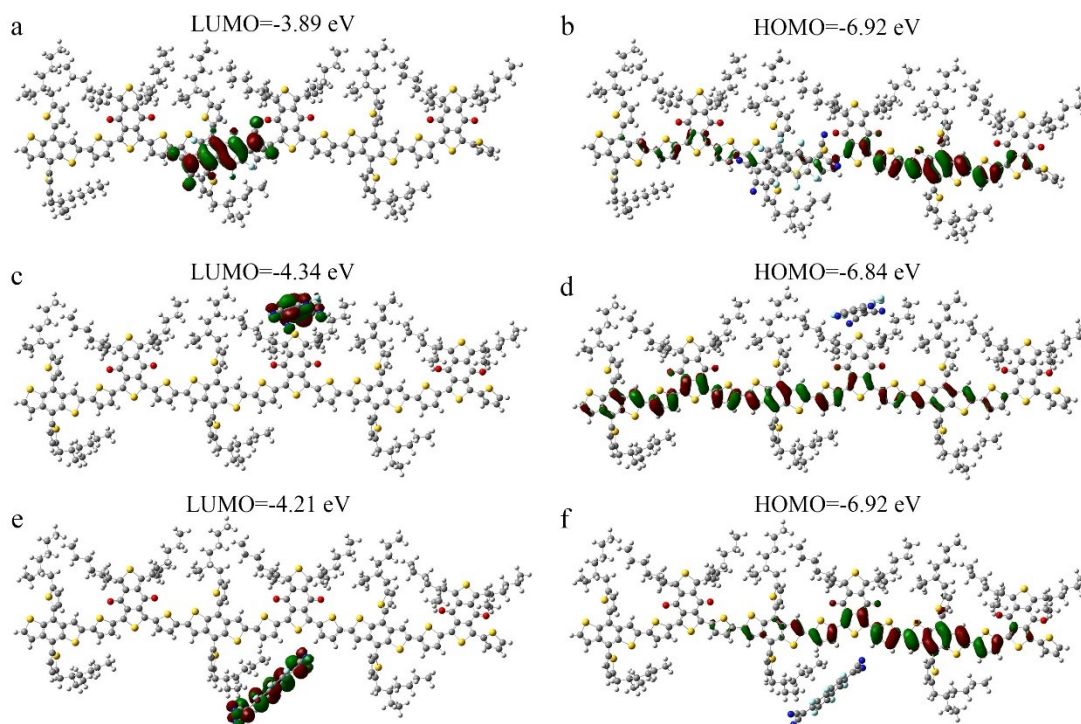

**Fig. S14** The frontier molecular orbitals [lowest unoccupied (LUMO) and highest occupied molecular orbital (HOMO)] obtained by DFT calculations for complex structure molecules of (a, b) F6TCNNQ/face-on PBDB-T, (c, d) F6TCNNQ/edge-on PBDB-T A model and (e, f) F6TCNNQ/edge-on PBDB-T B model.

## References

- 1 A. Hexemer, W. Bras, J. Glossinger, E. Schaible, E. Gann, R. Kirian, A. MacDowell, M. Church, B. Rude and H. Padmore, *J. Phys. Conf. Ser.*, 2010, **247**, 012007.
- 2 L. Ye, Y. Xiong, Z. Chen, Q. Zhang, Z. Fei, R. Henry, M. Heeney, B. T. O'Connor, W. You and H. Ade, *Adv. Mater.*, 2019, **31**, 1808153
- 3 L. Ye, Y. Xiong, Q. Zhang, S. Li, C. Wang, Z. Jiang, J. Hou, W. You and H. Ade, *Adv. Mater.*, 2018, **30**, 1705485.
- 4 J.-D. Chai and M. Head-Gordon, *Phys. Chem. Chem. Phys.*, 2008, **10**, 6615–6620.
- 5 P. J. Hay and W. R. Wadt, *J. Chem. Phys.*, 1985, **82**, 284–298.
- 6 W. J. Hehre, R. Ditchfield and J. Pople, *J. Chem. Phys.*, 1972, **56**, 2257–2261.
- 7 R. Ditchfield, W. J. Hehre and J. A. Pople, *J. Chem. Phys.*, 1971, **54**, 724–728.
- 8 P. C. Hariharan and J. A. Pople, *Theoret. chim. Acta*, 1973, **28**, 213–222.
- 9 R. Krishnan, J. S. Binkley, R. Seeger and J. A. Pople, *J. Chem. Phys.*, 1980, **72**, 650–654.
- 10 Gaussian.; A. Revision, M. J. Frisch, G. W. Trucks, H. B. Schlegel, G. E. Scuseria, M. A. Robb, J. R. Cheeseman, G. Scalmani, V. Barone, G. A. Petersson, H. Nakatsuji, X. Li, M. Caricato, A. V. Marenich, J. Bloino, B. G. Janesko, R. Gomperts, B. Mennucci, H. P. Hratchian, J. V. Ortiz, A. F. Izmaylov, J. L. Sonnenberg, D. Williams-Young, F. Ding, F. Lipparini, F. Egidi, J. Goings, B. Peng, A. Petrone, T. Henderson, D. Ranasinghe, V. G. Zakrzewski, J. Gao, N. Rega, G. Zheng, W. Liang, M. Hada, M. Ehara, K. Toyota, R. Fukuda, J. Hasegawa, M. Ishida, T. Nakajima, Y. Honda, O. Kitao, H. Nakai, T. Vreven, K. Throssell, J. A. Montgomery, Jr. J. E. Peralta, F. Ogliaro, M. J. Bearpark, J. J. Heyd, E. N. Brothers, K. N. Kudin, V. N. Staroverov, T. A. Keith, R. Kobayashi, J. Normand, K. Raghavachari, A. P. Rendell, J. C. Burant, S. S. Iyengar, J. Tomasi, M. Cossi, J. M. Millam, M. Klene, C. Adamo, R. Cammi, J. W. Ochterski, R. L. Martin, K. Morokuma, O. Farkas, J. B. Foresman, and D. J. Fox, Gaussian, Inc., Wallingford CT, 2016.
- 11 T. Lu and F. J. Chen, *Comput. Chem.*, 2012, **33**, 580–592.
